# Supplementary material for: Dipeptide of ψ-GSH Inhibits Oxidative Stress and Neuroinflammation in an Alzheimer’s Disease Mouse Model
Source: Antioxidants (Basel). 2022 May 28;11(6):1075. doi: 10.3390/antiox11061075 (PMC9219802; doi:10.3390/antiox11061075)
Supplement: Supplementary file 1 [file antioxidants-11-01075-s001.zip › antioxidants-1737635-supplementary.pdf]

## **Supplementary File 1**

Supplementary Figures S1-S5

For

Dipeptide of  $\psi$ -GSH Inhibits Oxidative Stress and Neuroinflammation in an Alzheimer's  
Disease Mouse Model

Abbas Raza <sup>1,†</sup>, Wei Xie <sup>1,†</sup>, Kwan Hyun Kim <sup>1</sup>, Venkateshwara Rao Dronamraju <sup>1</sup>,  
Jessica Williams <sup>1</sup>, Robert Vince <sup>1</sup>, and Swati S. More <sup>1,\*</sup>

**A**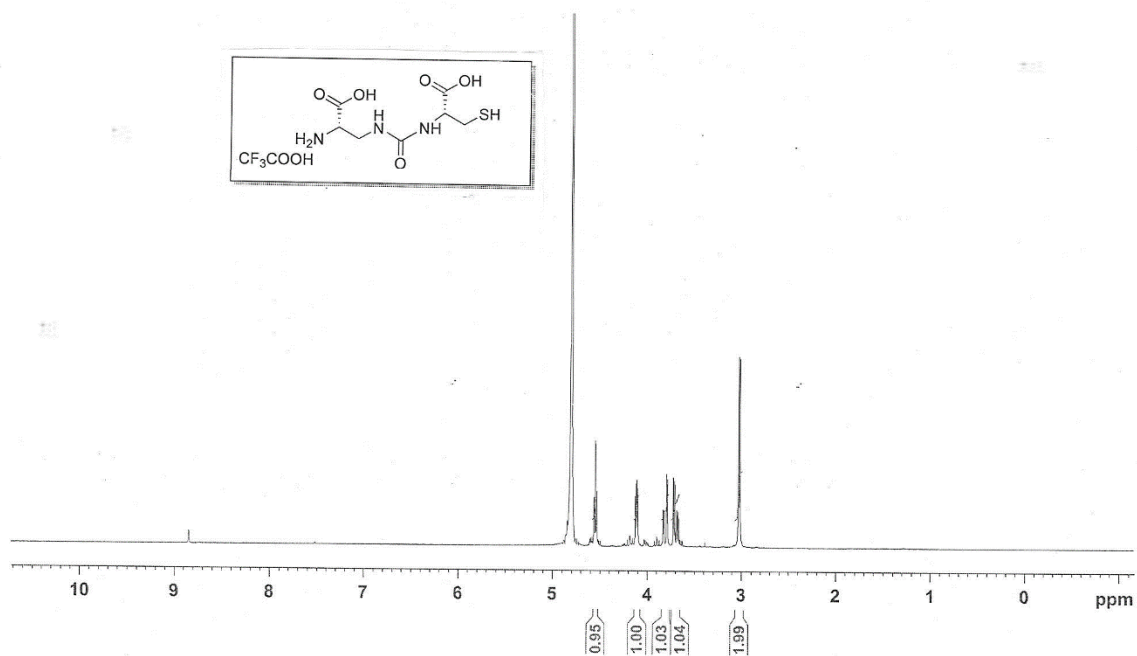**B**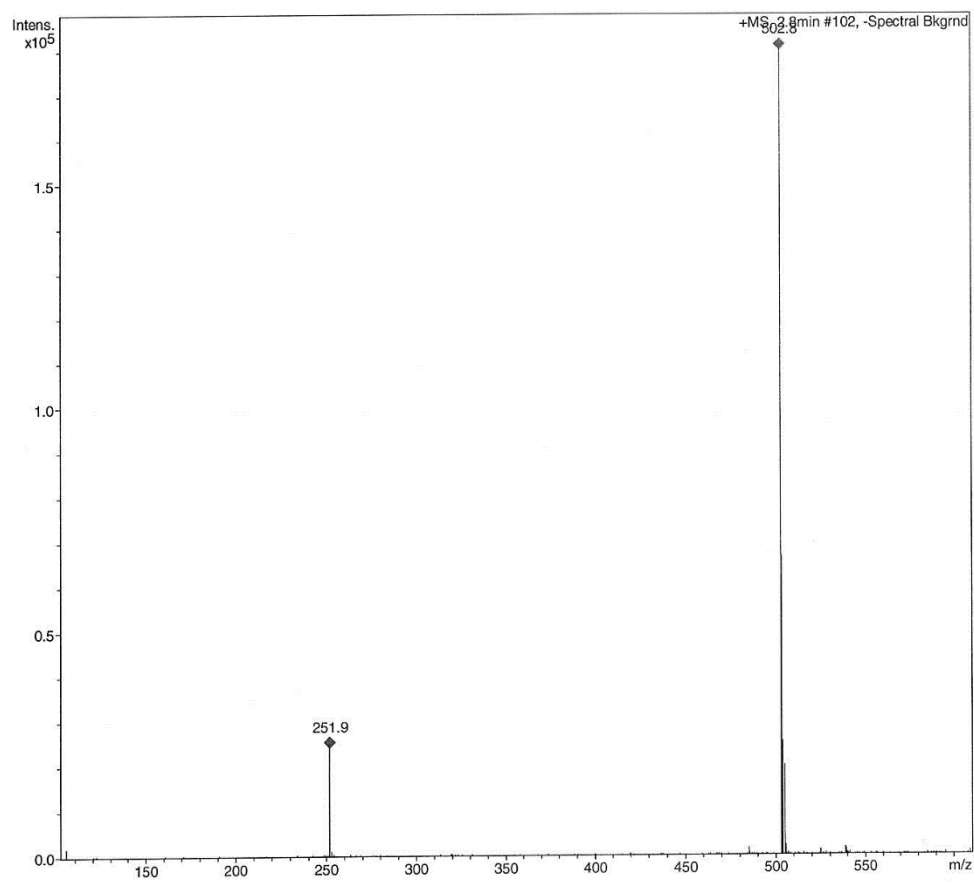

C

Acq. Method : D:\METHODS\AB-5(15).M\AB-5(15).M  
Analysis Method : D:\METHODS\AB-5(15).M\AB-5(15).M

Column: Synergi Fusion RP (150X4.6mm, 4.0um)  
Mobile Phase: 0.1%Aq TFA  
Flow Rate: 1.0mL/min. Drift: 60°C, Gain: 5

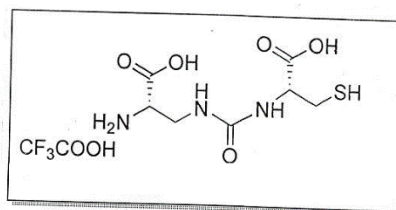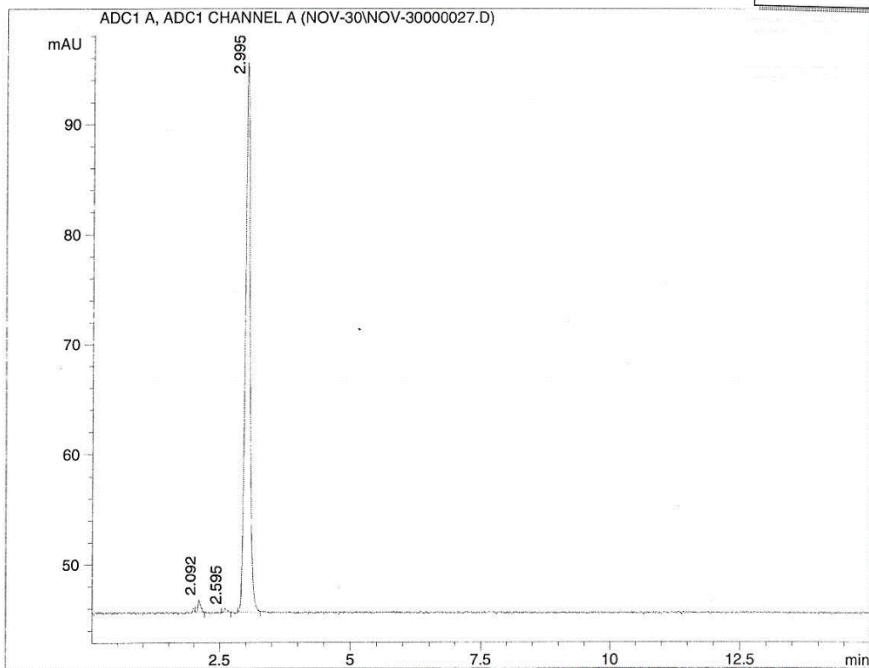

Signal 1: ADC1 A, ADC1 CHANNEL A

| Peak # | RT [min] | Type | Width [min] | Area    | Area % |
|--------|----------|------|-------------|---------|--------|
| 1      | 2.092    | MM   | 0.058       | 3.874   | 1.202  |
| 2      | 2.595    | MM   | 0.066       | 1.322   | 0.410  |
| 3      | 2.995    | MM   | 0.106       | 317.189 | 98.388 |

**Figure S1.**  $^1\text{H}$  NMR (A), mass spectrum (B), and HPLC purity (C) analysis of compound **2**.

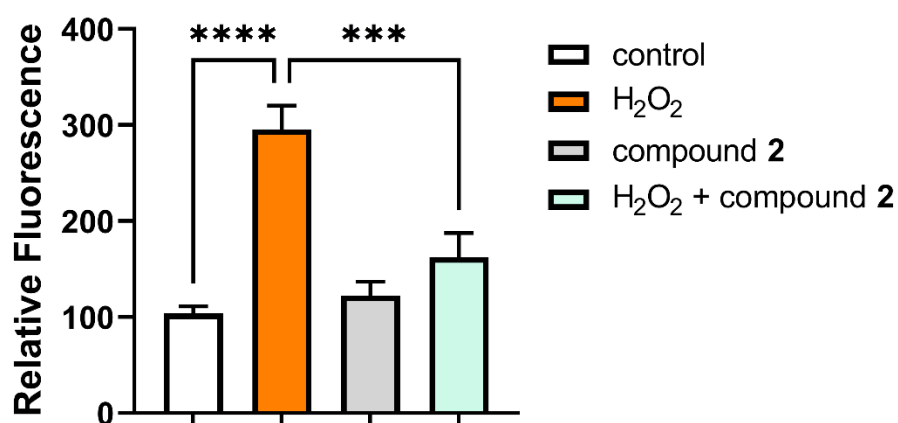

**Figure S2.** Measurement of intracellular ROS using DCFH-DA. Oxidative stress was induced in SH-SY-5Y cells by exposure to 500  $\mu$ M concentration of H<sub>2</sub>O<sub>2</sub> (500  $\mu$ M) for 90 min. Treatment with compound 2 was initiated 30 min prior to H<sub>2</sub>O<sub>2</sub> exposure and continued during the 90 min peroxide exposure period. Increase in DCF fluorescence was used as a measure of intracellular ROS content. The data are presented as the mean  $\pm$  SEM of two independent experiments (\*\* $p$  < 0.005, \*\*\*\*  $p$  < 0.001).

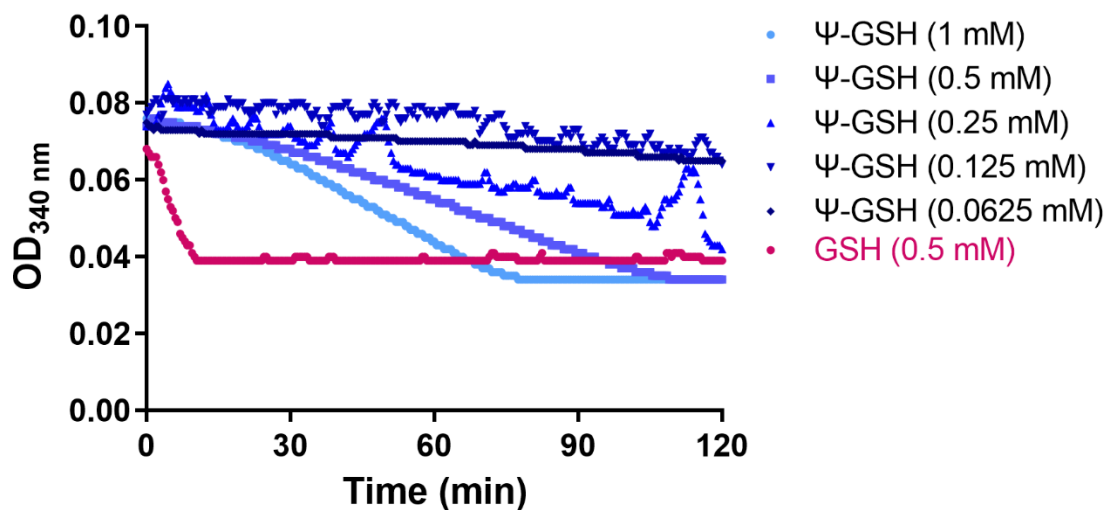

**Figure S3.** Glutathione peroxidase enzymatic assay using  $\psi$ -GSH as a cofactor. Measurement of glutathione peroxidase activity was performed using the purified enzyme in the presence of  $\psi$ -GSH or GSH as cofactors. In this coupled enzymatic assay, consumption of NADPH by glutathione reductase to reduce oxidized  $\psi$ -GSH or GSH was measured. Levels of NADPH measured as absorbance at 340 nm are plotted against time and used as an indicator of enzymatic activity.

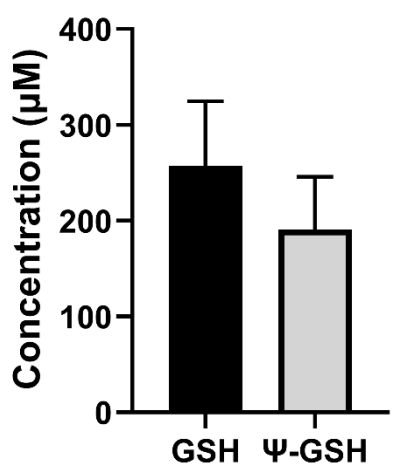

**Figure S4.** Conversion of  $\gamma$ -Glu-Cys and compound **2** to GSH or  $\psi$ -GSH (**1**), respectively, after incubation in brain homogenates. Compounds  $\gamma$ -Glu-Cys and **2** were incubated (final concentration 1 mM) at 37 °C for 2 hours and the levels of respective tripeptides formed were measured by LC-MS/MS analysis. Comparable formation of GSH and  $\psi$ -GSH were detected from respective tripeptides. Data are means  $\pm$  SEM of two independent experiments.

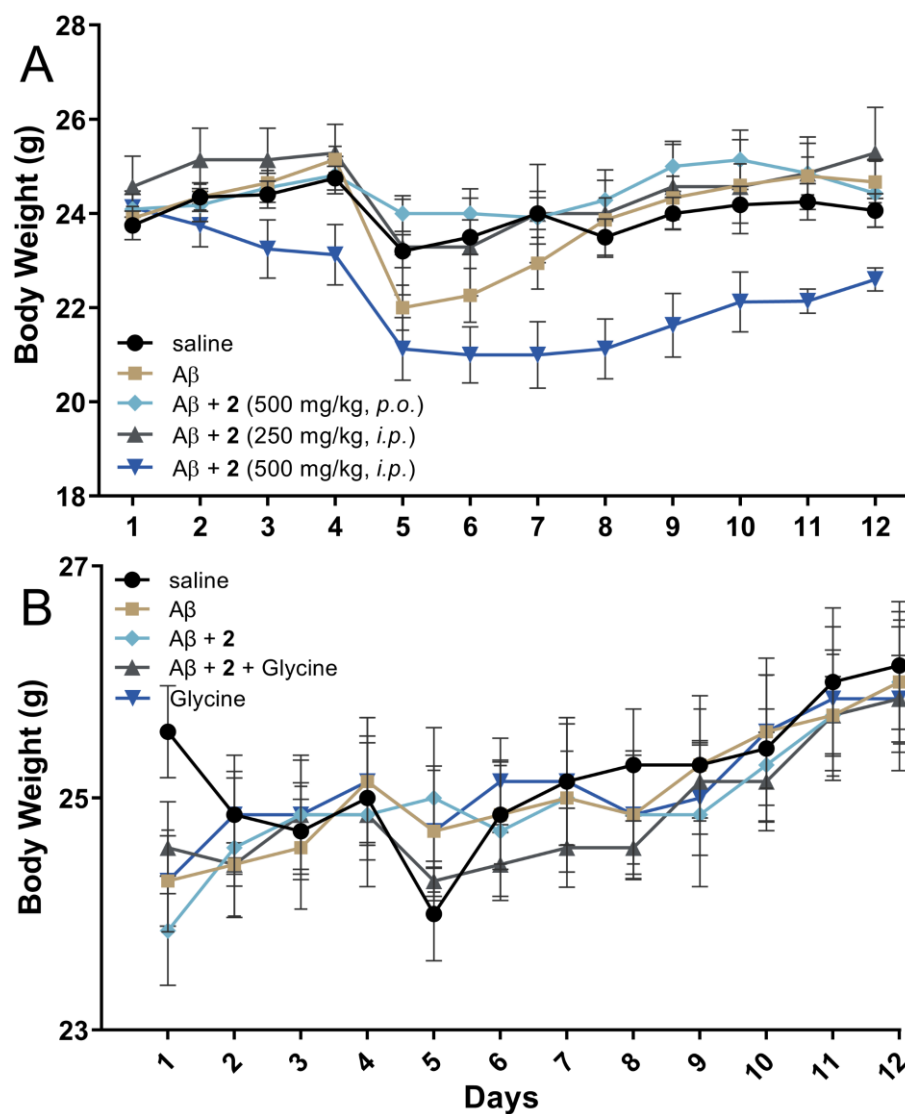

**Figure S5.** Changes in body weights of mice treated in studies related to sections 3.6 (A) and 3.8 (B). Except for the compound **2** (500 mg/kg, *i.p.*) group, none of the treatment groups showed any significant reduction in body weights.
